# Supplementary material for: Effect of density of surface defects on photoluminescence properties in MAPbI3 perovskite films
Source: Royal Society of Chemistry journal article supplement (doi:10.1039/c8tc05998e), 2019-01-01
Supplement: c8tc05998e1.pdf [file c8tc05998e1.pdf]

## Supporting Information

# Effect of Density of Surface Defects on Photoluminescence Properties in MAPbI<sub>3</sub> Perovskite Films

*Paul Fassl<sup>a,b</sup>, Yuriy Zakharko<sup>c †</sup>, Lukas M. Falk<sup>a,b</sup>, Katelyn P. Goetz<sup>a,b</sup>, Fabian Paulus,<sup>a,b,c</sup>  
Alexander D. Taylor<sup>a,b</sup>, Jana Zaumseil<sup>b,c</sup> and Yana Vaynzof<sup>a,b \*</sup>*

<sup>a</sup> Kirchhoff Institute for Physics, Heidelberg University, 69120 Heidelberg, Germany

<sup>b</sup> Centre for Advanced Materials, Heidelberg University, 69120 Heidelberg, Germany

<sup>c</sup> Institute for Physical Chemistry, Heidelberg University, 69120 Heidelberg, Germany

<sup>†</sup> Present address: Department of Physics, Technical University of Denmark, 2800 Kongens

Lyngby, Denmark

### Corresponding Author

\* Email: [vaynzof@uni-heidelberg.de](mailto:vaynzof@uni-heidelberg.de).

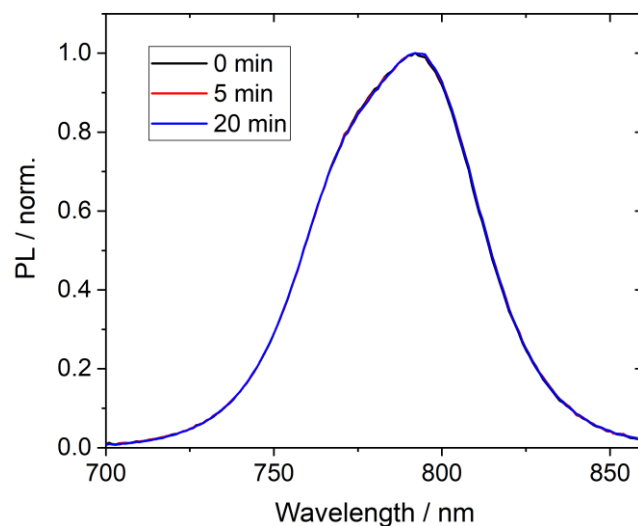

**Figure S1:** PL spectra of a glass/MAPbI<sub>3</sub> film with  $y = 3.03$  after 0, 5 and 20 minutes of illumination with a 532 nm CW laser with an intensity of 120 mW/cm<sup>2</sup>, measured inside an integrating sphere.

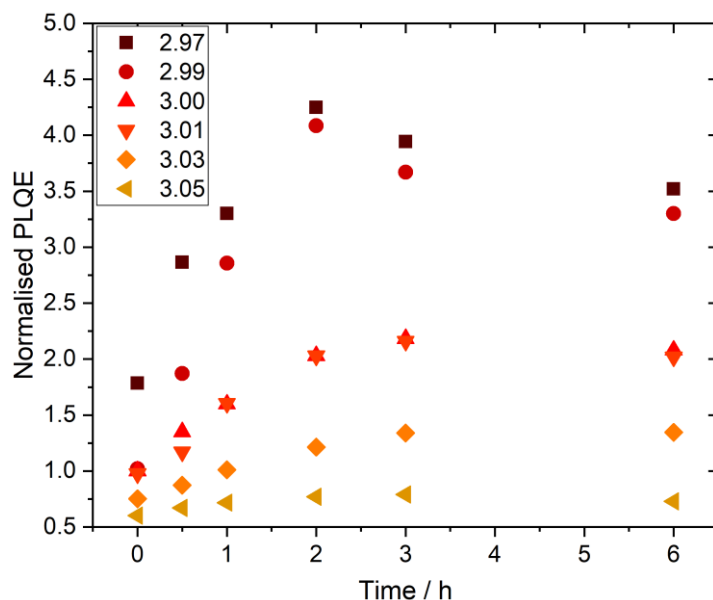

**Figure S2:** Temporal evolution of the PLQE upon long-term storage in ambient atmosphere and low levels of white light illumination for perovskite films fabricated from different stoichiometries  $y$ . The PLQE was normalized to the initial PLQE of the stoichiometric sample ( $y = 3.00$ ) for ease of comparison to other batches.

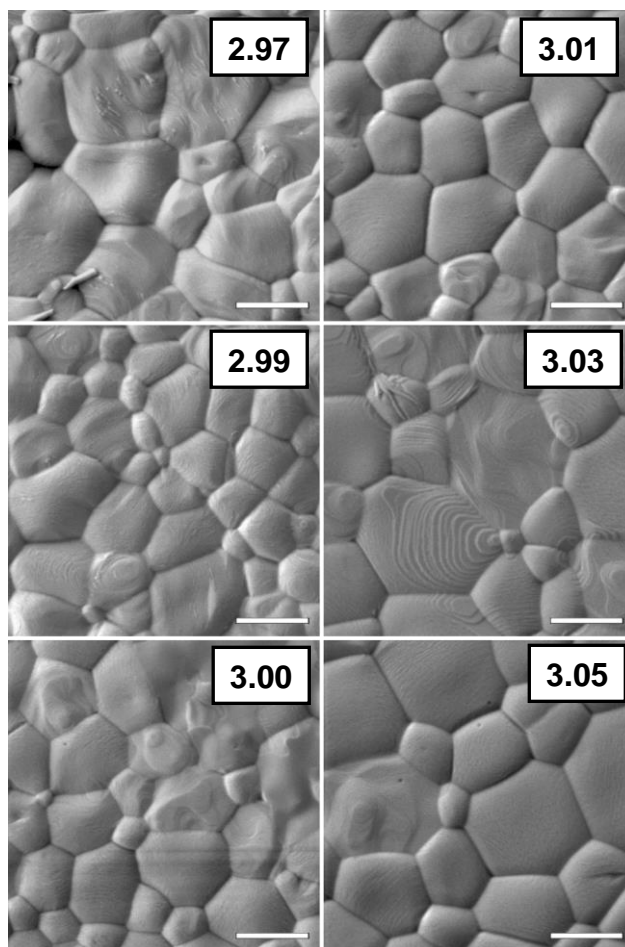

**Figure S3:** SEM images of perovskite films fabricated from different stoichiometries  $y$ . Scale bar is 1  $\mu\text{m}$ .

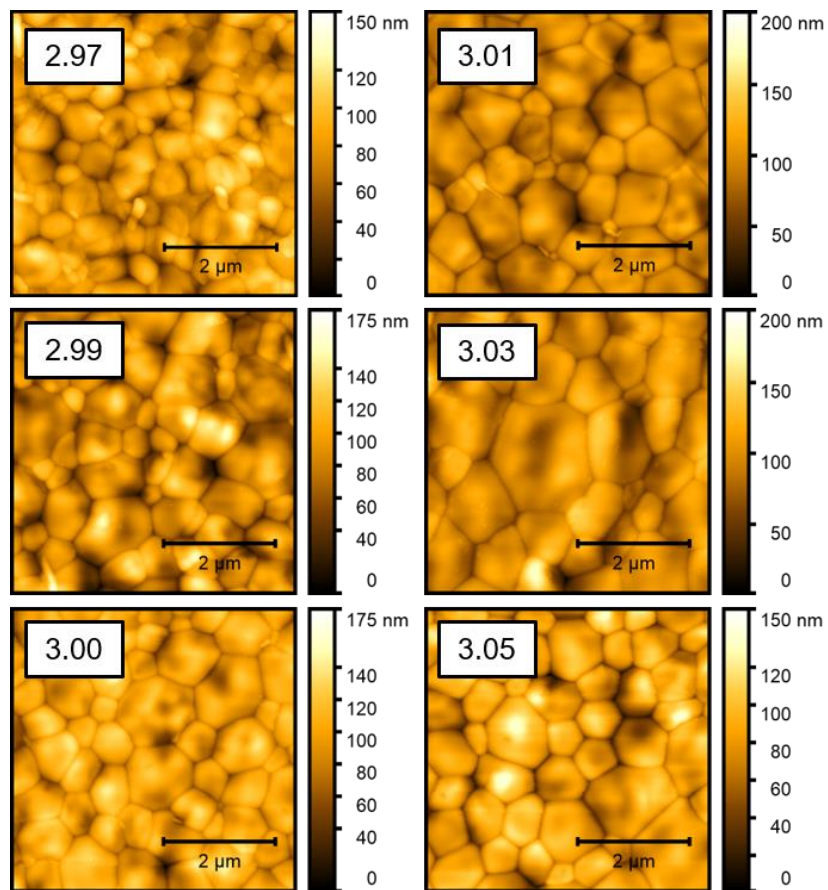

**Figure S4:** AFM micrographs of perovskite films fabricated from different stoichiometries  $y$ .

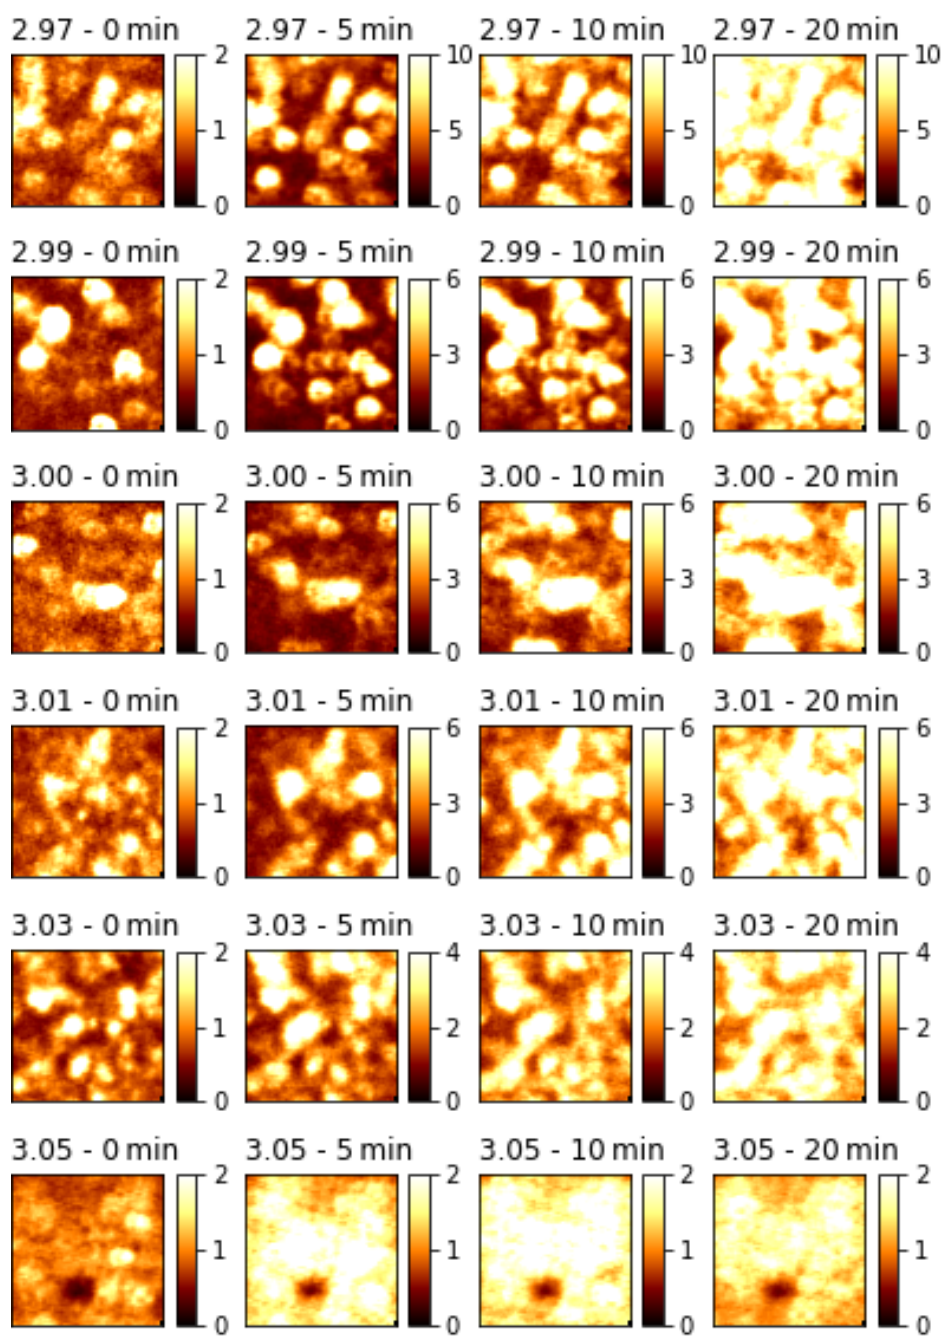

**Figure S5:** PL maps for all stoichiometries after 0, 5, 10 and 20 min of storage in ambient atmosphere and low levels of illumination, normalized to the average value of the 0 min map for each stoichiometry.

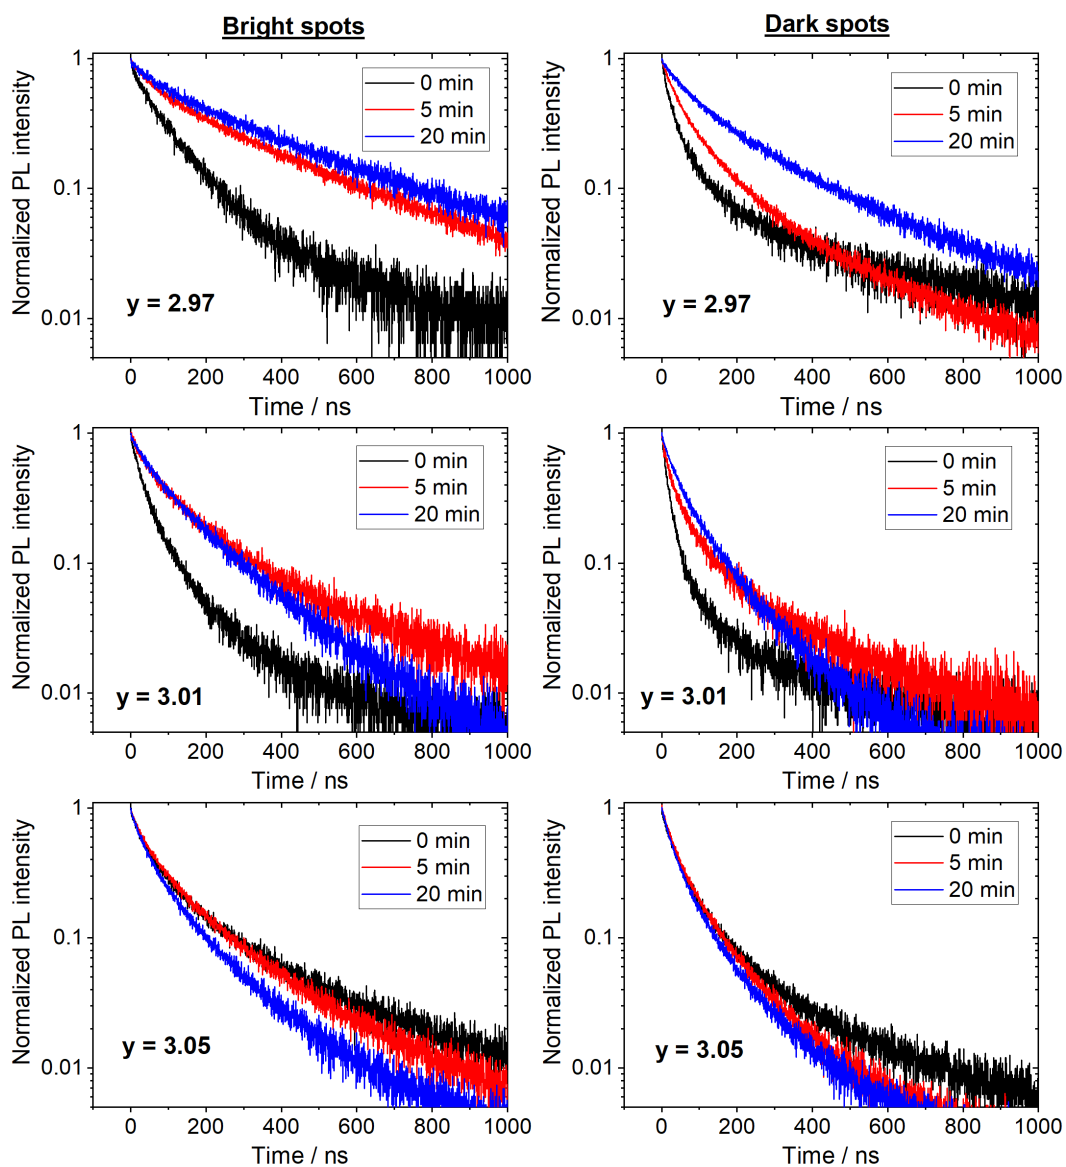

**Figure S6:** Representative PL decay data for stoichiometries  $y = 2.97/3.01/3.05$  after 0, 5 and 20 minutes for bright (left) and dark (right) regions (see Figure 3 in the main text).

**Table S1:** Fit results using equation (2) for the **bright** PL regions (see Figure 4).

| Fit parameters \ Stoichiometry $y$ |                  | 2.97       | 2.99         | 3.00       | 3.01       | 3.03       | 3.05       |
|------------------------------------|------------------|------------|--------------|------------|------------|------------|------------|
|                                    |                  | 0 min      | $A_1$ (rel.) | 0.02       | 0.08       | 0.10       | 0.44       |
| $\tau_1$ [ns]                      | 3                |            | 10           | 21         | 34         | 40         | 46         |
| $A_2$ (rel.)                       | 0.98             |            | 0.92         | 0.90       | 0.56       | 0.88       | 0.70       |
| $\tau_2$ [ns]                      | 52               |            | 79           | 51         | 44         | 100        | 92         |
| b                                  | 0.73             |            | 0.58         | 0.44       | 0.61       | 0.65       | 0.63       |
| $\tau_{Av}$ [ns]                   | <b>89</b>        |            | <b>114</b>   | <b>122</b> | <b>52</b>  | <b>125</b> | <b>106</b> |
| 5 min                              | $A_1$ (rel.)     | 0.21       | 0.31         | 0.24       | 0.15       | 0.07       | 0.18       |
|                                    | $\tau_1$ [ns]    | 45         | 27           | 50         | 74         | 27         | 49         |
|                                    | $A_2$ (rel.)     | 0.79       | 0.69         | 0.76       | 0.85       | 0.93       | 0.82       |
|                                    | $\tau_2$ [ns]    | 247        | 209          | 100        | 91         | 207        | 89         |
|                                    | b                | 0.79       | 0.76         | 0.58       | 0.63       | 0.68       | 0.68       |
|                                    | $\tau_{Av}$ [ns] | <b>233</b> | <b>179</b>   | <b>131</b> | <b>122</b> | <b>251</b> | <b>103</b> |
| 10 min                             | $A_1$ (rel.)     | 0.12       | 0.25         | 0.1        | 0.18       | 0.07       | 0.22       |
|                                    | $\tau_1$ [ns]    | 37         | 32           | 33         | 87         | 30         | 40         |
|                                    | $A_2$ (rel.)     | 0.88       | 0.75         | 0.9        | 0.82       | 0.93       | 0.78       |
|                                    | $\tau_2$ [ns]    | 312        | 178          | 123        | 125        | 208        | 95         |
|                                    | b                | 0.79       | 0.73         | 0.63       | 0.69       | 0.72       | 0.74       |
|                                    | $\tau_{Av}$ [ns] | <b>312</b> | <b>171</b>   | <b>161</b> | <b>147</b> | <b>241</b> | <b>97</b>  |
| 20 min                             | $A_1$ (rel.)     | 0.04       | 0.22         | 0.19       | 0.16       | 0.14       | 0.28       |
|                                    | $\tau_1$ [ns]    | 2          | 35           | 38         | 51         | 58         | 41         |
|                                    | $A_2$ (rel.)     | 0.96       | 0.78         | 0.81       | 0.84       | 0.86       | 0.72       |
|                                    | $\tau_2$ [ns]    | 245        | 174          | 186        | 116        | 196        | 77         |
|                                    | b                | 0.74       | 0.75         | 0.71       | 0.81       | 0.73       | 0.72       |
|                                    | $\tau_{Av}$ [ns] | <b>285</b> | <b>169</b>   | <b>195</b> | <b>118</b> | <b>213</b> | <b>80</b>  |

**Table S2:** Fit results using equation (2) for the **medium** PL regions (see Figure 4).

| Fit parameters \ Stoichiometry $y$ |                  | 2.97         | 2.99         | 3.00       | 3.01       | 3.03       | 3.05      |
|------------------------------------|------------------|--------------|--------------|------------|------------|------------|-----------|
|                                    |                  | <b>0 min</b> | $A_1$ (rel.) | 0.32       | 0.34       | 0.19       | 0.49      |
|                                    | $\tau_1$ [ns]    | 43           | 34           | 36         | 26         | 39         | 48        |
|                                    | $A_2$ (rel.)     | 0.68         | 0.66         | 0.81       | 0.51       | 0.59       | 0.71      |
|                                    | $\tau_2$ [ns]    | 45           | 35           | 25         | 23         | 68         | 73        |
|                                    | b                | 0.54         | 0.48         | 0.43       | 0.53       | 0.66       | 0.65      |
|                                    | $\tau_{Av}$ [ns] | <b>68</b>    | <b>60</b>    | <b>61</b>  | <b>34</b>  | <b>69</b>  | <b>85</b> |
| <b>5 min</b>                       | $A_1$ (rel.)     | 0.23         | 0.25         | 0.17       | 0.24       | 0.10       | 0.25      |
|                                    | $\tau_1$ [ns]    | 55           | 23           | 43         | 50         | 82         | 40        |
|                                    | $A_2$ (rel.)     | 0.77         | 0.75         | 0.83       | 0.76       | 0.90       | 0.75      |
|                                    | $\tau_2$ [ns]    | 125          | 144          | 58         | 70         | 115        | 90        |
|                                    | b                | 0.65         | 0.74         | 0.57       | 0.57       | 0.63       | 0.75      |
|                                    | $\tau_{Av}$ [ns] | <b>145</b>   | <b>135</b>   | <b>86</b>  | <b>96</b>  | <b>155</b> | <b>90</b> |
| <b>10 min</b>                      | $A_1$ (rel.)     | 0.10         | 0.25         | 0.15       | 0.19       | 0.15       | 0.28      |
|                                    | $\tau_1$ [ns]    | 48           | 29           | 47         | 40         | 86         | 39        |
|                                    | $A_2$ (rel.)     | 0.90         | 0.75         | 0.85       | 0.81       | 0.85       | 0.72      |
|                                    | $\tau_2$ [ns]    | 161          | 160          | 81         | 101        | 129        | 89        |
|                                    | b                | 0.64         | 0.76         | 0.61       | 0.69       | 0.66       | 0.77      |
|                                    | $\tau_{Av}$ [ns] | <b>207</b>   | <b>149</b>   | <b>110</b> | <b>113</b> | <b>160</b> | <b>86</b> |
| <b>20 min</b>                      | $A_1$ (rel.)     | 0.15         | 0.27         | 0.18       | 0.15       | 0.12       | 0.33      |
|                                    | $\tau_1$ [ns]    | 91           | 36           | 51         | 38         | 61         | 37        |
|                                    | $A_2$ (rel.)     | 0.85         | 0.73         | 0.82       | 0.85       | 0.88       | 0.67      |
|                                    | $\tau_2$ [ns]    | 229          | 168          | 121        | 94         | 120        | 80        |
|                                    | b                | 0.75         | 0.77         | 0.68       | 0.78       | 0.67       | 0.77      |
|                                    | $\tau_{Av}$ [ns] | <b>247</b>   | <b>154</b>   | <b>139</b> | <b>98</b>  | <b>146</b> | <b>75</b> |



**Table S3:** Fit results using equation (2) for the **dark** PL regions (see Figure 4).

| Fit parameters \ Stoichiometry $y$ |                  | 2.97         | 2.99         | 3.00      | 3.01      | 3.03       | 3.05      |
|------------------------------------|------------------|--------------|--------------|-----------|-----------|------------|-----------|
|                                    |                  | <b>0 min</b> | $A_1$ (rel.) | 0.45      | 0.30      | 0.24       | 0.66      |
|                                    | $\tau_1$ [ns]    | 26           | 17           | 13        | 17        | 28         | 41        |
|                                    | $A_2$ (rel.)     | 0.55         | 0.70         | 0.76      | 0.34      | 0.45       | 0.60      |
|                                    | $\tau_2$ [ns]    | 38           | 28           | 29        | 24        | 42         | 60        |
|                                    | b                | 0.47         | 0.42         | 0.43      | 0.48      | 0.55       | 0.62      |
|                                    | $\tau_{Av}$ [ns] | <b>57</b>    | <b>62</b>    | <b>63</b> | <b>27</b> | <b>45</b>  | <b>69</b> |
| <b>5 min</b>                       | $A_1$ (rel.)     | 0.34         | 0.27         | 0.22      | 0.32      | 0.20       | 0.33      |
|                                    | $\tau_1$ [ns]    | 46           | 29           | 28        | 26        | 55         | 33        |
|                                    | $A_2$ (rel.)     | 0.66         | 0.73         | 0.78      | 0.68      | 0.80       | 0.67      |
|                                    | $\tau_2$ [ns]    | 80           | 44           | 37        | 41        | 63         | 65        |
|                                    | b                | 0.65         | 0.55         | 0.48      | 0.54      | 0.55       | 0.74      |
|                                    | $\tau_{Av}$ [ns] | <b>87</b>    | <b>64</b>    | <b>67</b> | <b>57</b> | <b>96</b>  | <b>64</b> |
| <b>10 min</b>                      | $A_1$ (rel.)     | 0.14         | 0.22         | 0.18      | 0.31      | 0.14       | 0.35      |
|                                    | $\tau_1$ [ns]    | 66           | 37           | 36        | 33        | 47         | 31        |
|                                    | $A_2$ (rel.)     | 0.86         | 0.78         | 0.82      | 0.69      | 0.86       | 0.65      |
|                                    | $\tau_2$ [ns]    | 103          | 52           | 48        | 58        | 84         | 68        |
|                                    | b                | 0.61         | 0.58         | 0.54      | 0.62      | 0.62       | 0.76      |
|                                    | $\tau_{Av}$ [ns] | <b>139</b>   | <b>72</b>    | <b>74</b> | <b>67</b> | <b>111</b> | <b>62</b> |
| <b>20 min</b>                      | $A_1$ (rel.)     | 0.20         | 0.23         | 0.17      | 0.21      | 0.14       | 0.37      |
|                                    | $\tau_1$ [ns]    | 73           | 45           | 30        | 37        | 55         | 32        |
|                                    | $A_2$ (rel.)     | 0.80         | 0.77         | 0.83      | 0.79      | 0.86       | 0.63      |
|                                    | $\tau_2$ [ns]    | 165          | 76           | 70        | 62        | 77         | 59        |
|                                    | b                | 0.73         | 0.65         | 0.62      | 0.73      | 0.60       | 0.73      |
|                                    | $\tau_{Av}$ [ns] | <b>175</b>   | <b>90</b>    | <b>89</b> | <b>68</b> | <b>108</b> | <b>57</b> |
